# Supplementary material for: Research hotspots and frontiers of application of mass spectrometry breath test in respiratory diseases
Source: Front Med (Lausanne). 2025 Aug 13;12:1618588. doi: 10.3389/fmed.2025.1618588 (PMC12380590; doi:10.3389/fmed.2025.1618588)
Supplement: Supplementary file 1 [file Data_Sheet_1.xlsx]

## Sheet: Table S1
Keyword Clustering Details.
ClusterID	Size	Silhouette	Year	Top terms (LSI)	Top terms (LLR)
0	32	0.894	2013	lung cancer; volatile organic compounds; breath analysis; mass spectrometry; biomarkers | electronic nose; gas chromatography ion mobility; glutamine metabolism; high resolution mass spectrometry; artificial neural network	lung cancer (47.24, 1.0E-4); cystic fibrosis (11.85, 0.001); early diagnosis (10.96, 0.001); sensor (7.45, 0.01); electronic noses (7.45, 0.01)
1	31	0.855	2014	breath condensate; chronic obstructive pulmonary disease; bronchial asthma; gas chromatography-mass spectrometry; closing volume | volatile organic compounds; obstructive sleep apnea; closing volume; pressure chemical; multivariate analysis	inflammation (13.03, 0.001); viral infection (10.92, 0.001); particles (10.92, 0.001); lung cancer (10.03, 0.005); asthma (7.48, 0.01)
2	23	0.946	2014	volatile organic compounds; comprehensive two-dimensional gas chromatography; breath analysis; mycobacterium tuberculosis complex; intensive care | diagnostic pathology; early disease diagnosis; human diseases; electronic aroma detection; disease biomarker metabolites	comprehensive two-dimensional gas chromatography (15.92, 1.0E-4); acute lung injury (13.54, 0.001); pulmonary tuberculosis (13.54, 0.001); identification (9.8, 0.005); berlin definition (9.8, 0.005)
3	23	0.866	2017	volatile organic compounds; gas chromatography-mass spectrometry; electronic nose; chronic obstructive lung disease; breath markers | breath analysis; invasive pulmonary aspergillosis; headspace analysis; nocardia vulneris; mass spectrometry	gas chromatography-mass spectrometry (13.87, 0.001); ventilator-associated pneumonia (vap) (9.62, 0.005); pulmonary oxygen toxicity (8.02, 0.005); bacteria-derived metabolites (6.4, 0.05); stress (5.85, 0.05)
4	23	0.962	2009	breath analysis; breath sampling devices; breath sampling; end-tidal breath; multivariate analysis | volatile organic compounds; gas chromatography; mass spectrometry; benzene series; sorptive extraction	gas chromatography (10.21, 0.005); chemical sensors (7.76, 0.01); machine learning (7.21, 0.01); exhaled breath condensate (6.65, 0.01); exposure (6.15, 0.05)
5	23	0.941	2013	volatile organic compounds; lung cancer diagnostics; confounding factors; airway inflammation; artificial neural network | breath analysis; end-tidal breath; breath sampling devices; breath sampling; airway inflammation	airway inflammation (11.22, 0.001); liquid chromatography-mass spectrometry (7.95, 0.005); volatile organic compounds (6.36, 0.05); diagnosis (6.16, 0.05); occupational exposure (5.8, 0.05)
6	22	0.943	2013	volatile organic compounds; pseudomonas aeruginosa; 2 aminoacetophenone; headspace; exhaled breath | breath condensate; malignant pleural mesothelioma; pseudomonas aeruginosa; cell measurement; lung cancer	headspace analysis (11.5, 0.001); bronchial asthma (8.29, 0.005); cysteinyl leukotrienes (6.66, 0.01); asbestosis (5.99, 0.05); immunomagnetic separation (5.99, 0.05)
7	17	0.898	2014	volatile organic compounds; breath analysis; confounding factors; systems biology; airway inflammation | cystic fibrosis; acetic acid; systems biology; airway inflammation; diagnostic profiles	cystic fibrosis (24.15, 1.0E-4); pseudomonas aeruginosa (7.46, 0.01); proton mass spectrometry (6.5, 0.05); ion flow tube (6.5, 0.05); lung cancer (5.74, 0.05)
8	15	0.91	2014	breath condensate; biomarker discovery; lung cancer; sputum; gas chromatography-mass spectrometry | cystic fibrosis; obstructive sleep; ion mobility; clinical practice; tube mass	biomarker discovery (9.75, 0.005); leukotrienes (6.98, 0.01); bile constituents (6.74, 0.01); sarcoidosis (6.74, 0.01); secondary electrospray ionization-mass spectrometry (6.74, 0.01)
9	15	0.837	2015	volatile organic compounds; breath tests; breath condensate; nitric oxide; idiopathic pulmonary fibrosis | breath test; lung cancer; pulmonary nodule; single-photon ionization-mass spectrometry; biomarker discovery	pulmonary embolism (17.53, 1.0E-4); breath test (16.15, 1.0E-4); breath tests (9.49, 0.005); animal models (7.29, 0.01); invasive aspergillosis (7.29, 0.01)
10	14	0.801	2016	volatile organic compounds; breath condensate; obstructive sleep apnea; critical care; intensive care | breath analysis; volatile organic compound; lung clearance; mechanical ventilation; volatile organic compounds	lung clearance index (12.89, 0.001); mechanical ventilation (11.29, 0.001); preschool (9.16, 0.005); spirometry (7.51, 0.01); hrms (6.44, 0.05)
11	10	0.948	2011	breath condensate; oxidative stress; nitric oxide; respiratory symptoms; biological effect monitoring | volatile organic compounds; lipid peroxidation; breath test; acute respiratory distress syndrome; extracorporeal membrane oxygenation	lipid peroxidation (16.36, 1.0E-4); oxidative stress (11.59, 0.001); propionaldehyde (6.09, 0.05); mass spectrometry (5.7, 0.05); acute respiratory distress syndrome (4.86, 0.05)
12	10	0.977	2016	breath analysis; cystic fibrosis; volatile metabolites; pseudomonas aeruginosa; ion flow tube mass | cellular respiration; adverse outcome pathway; human exposome; mass spectrometry; breath condensate	human body fluids (8.41, 0.005); cellular respiration (8.41, 0.005); cost of care (8.41, 0.005); ce-ms (8.41, 0.005); adverse outcome pathway (8.41, 0.005)
13	7	0.957	2018	volatile organic compounds; pseudomonas aeruginosa; chronic infection; cell measurement; critical care | oropharyngeal cultures; lung; sputum; pathogens; microbiology	organic compounds (14.33, 0.001); breath (7.71, 0.01); volatile compounds (7.11, 0.01); background signal (6.23, 0.05); uncertainty (6.23, 0.05)

## Sheet: Table S2
Citation Document	Author , Year, Journal, Volume, Page, doi
Buszewski (2007)	Buszewski B, 2007, BMC, v21, p553, doi 10.1002/bmc.835
Machado (2005)	Machado RF, 2005, American journal of respiratory and critical care medicine, v171, p1286, doi 10.1164/rccm.200409-1184OC
Phillips (2003)	Phillips M, 2003, Chest, v123, p2115, doi 10.1378/chest.123.6.2115
Nakhleh (2017)	Nakhleh MK, 2017, ACS NANO, v11, p112, doi 10.1021/acsnano.6b04930
Dragonieri (2007)	Dragonieri S, 2007, JOURNAL OF ALLERGY AND CLINICAL IMMUNOLOGY, v120, p856, doi 10.1016/j.jaci.2007.05.043
Aurora (2005)	Aurora P, 2005, AMERICAN JOURNAL OF RESPIRATORY AND CRITICAL CARE MEDICINE, v171, p249, doi 10.1164/rccm.200407-895OC
Guntner (2019)	Guntner AT, 2019, ACS SENSORS, v4, p268, doi 10.1021/acssensors.8b00937
Phillips (2007)	Phillips M, 2007, TUBERCULOSIS, v87, p44, doi 10.1016/j.tube.2006.03.004
Wheelock (2013)	Wheelock CE, 2013, The European respiratory journal, v42, p802, doi 10.1183/09031936.00078812
Saalberg (2016)	Saalberg Y, 2016, CLINICA CHIMICA ACTA, v459, p5, doi 10.1016/j.cca.2016.05.013

## Sheet: Table S3
Co-citation Cited Reference	Author , Year, Journal, Volume, Page, doi
Phillips (1999)	Phillips M, 1999, Lancet, v353, p1930, doi 10.1016/s0140-6736(98)07552-7
Pauling (1971)	Pauling L, 1971, Proc Natl Acad Sci USA, v68, p2374, doi 10.1073/pnas.68.10.2374
Miekisch (2004)	Miekisch W, 2004, Clin Chim Acta, v347, p25, doi 10.1016/j.cccn.2004.04.023
Horváth (2005)	Horvath I, 2005, Eur Respir J, v26, p523, doi 10.1183/09031936.05.00029705
Hakim (2012)	Hakim M, 2012, Chem Rev, v112, p5949, doi 10.1021/cr300174a
Phillips (2003)	Phillips M, 2003, Chest, v123, p2115, doi 10.1378/chest.123.6.2115
Bajtarevic (2009)	Bajtarevic A, 2009, BMC Cancer, v9, doi 10.1186/1471-2407-9-348
Costello (2014)	Costello BD, 2014, J Breath Res, v8, doi 10.1088/1752-7155/8/1/014001
Fuchs (2010)	Fuchs P, 2010, Int J Cancer, v126, p2663, doi 10.1002/ijc.24970
Horváth (2017)	Horváth I, 2017, Eur Respir J, v49, doi 10.1183/13993003.00965-2016
